# Supplementary material for: TRPM2 regulates TXNIP-mediated NLRP3 inflammasome activation via interaction with p47 phox under high glucose in human monocytic cells
Source: PubMed Central journal article supplement (PMC5059733; doi:10.1038/srep35016), 2016-10-12
Supplement: srep35016-s1.pdf [file srep35016-s1.pdf]

**TRPM2 regulates TXNIP-mediated NLRP3 inflammasome activation via interaction with p47phox under high glucose in human monocytic cells**

Hisa Hui Ling Tseng\*, Chi Teng Vong\*, Yiu Wa Kwan†, Simon Ming-Yuen Lee\*,  
Maggie Pui Man Hoi\*

*\*State Key Laboratory of Quality Research in Chinese Medicine, Institute of Chinese Medical Sciences, University of Macau, Avenida da Universidade, Taipa, Macau, China*

*†School of Biomedical Sciences, Faculty of Medicine, The Chinese University of Hong Kong, Shatin, N.T., Hong Kong, China*

\*Corresponding author: Dr. Maggie Pui Man Hoi, Institute of Chinese Medical Sciences University of Macau, Room 7012, N22 Research Building, Avenida da Universidade, Taipa, Macau, China. Telephone: (+853) 8822-4876; Fax: (+853) 28841358. Email address, [maghoi@umac.mo](mailto:maghoi@umac.mo).

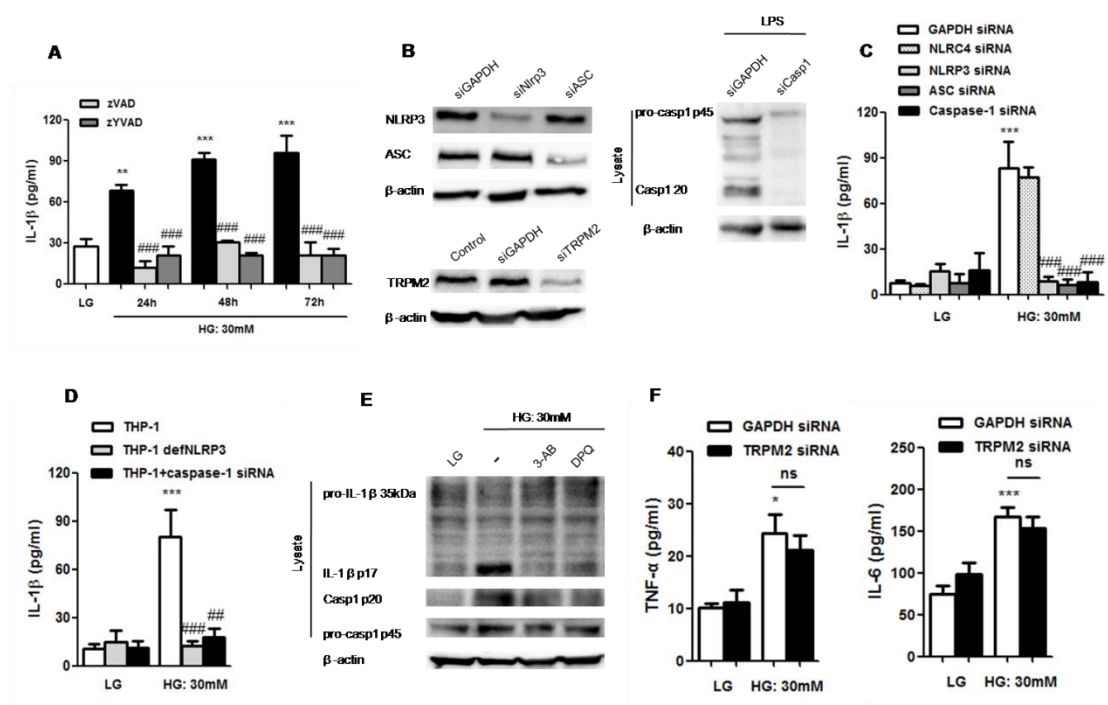

**Supplementary Figure S1.** (A,C,D-F) ELISA for IL-1 $\beta$ , TNF- $\alpha$  or IL-6 secretion from the supernatants of treated cells. (A) U937 cells were stimulated with low glucose (LG; 5.5mM glucose) or high glucose (HG; 30mM glucose for 24h, 48h or 72h) in the presence of Z-VAD-FMK (zVAD; 10 $\mu$ M) or Z-YVAD-FMK (zYVAD; 10 $\mu$ M) (n=5). (B) Representative immunoblots for NLRP3, ASC, TRPM2, caspase-1 and  $\beta$ -actin in GAPDH-, NLRP3-, ASC-, TRPM2- or caspase-1-siRNA-treated U937 cells (n=4). (C,E,F) U937 cells were stimulated with LG or HG in the presence of (C) GAPDH-, NLRP3-, ASC-, caspase-1- or NLRC4-siRNA, or (F) GAPDH- or TRPM2-siRNA (n=5). (D) THP-1 cells, and THP-1 with NLRP3 inflammasome deficient cells (THP1-defNLRP3), and caspase-1-siRNA-treated THP-1 cells were stimulated with HG (n=5). (E) Representative immunoblots for pro-IL-1 $\beta$ , IL-1 $\beta$  p17, Casp1 p20 and  $\beta$ -actin in U937 cells treated with LG, 3-AB or DPO under HG (30mM) conditions.

pro-caspase-1, cleaved caspase-1 (p20), GAPDH and  $\beta$ -actin in the presence of pre-treatment of 3-aminobenzamide (3-AB; 5mM) or 3,4-dihydro-5-[4-(1-piperidinyl)butoxy]-1(2H)-isoquinolinone (DPQ; 100 $\mu$ M) under HG (n=4). Data were shown as mean  $\pm$  S.E.M. (A,D)  $**P<0.01$  and  $***P<0.001$  vs. LG;  $##P<0.01$  and  $###P<0.001$  vs. HG. (C,F)  $*P<0.05$  and  $***P<0.001$  vs. LG+GAPDH-siRNA;  $###P<0.001$  vs. HG +GAPDH-siRNA.

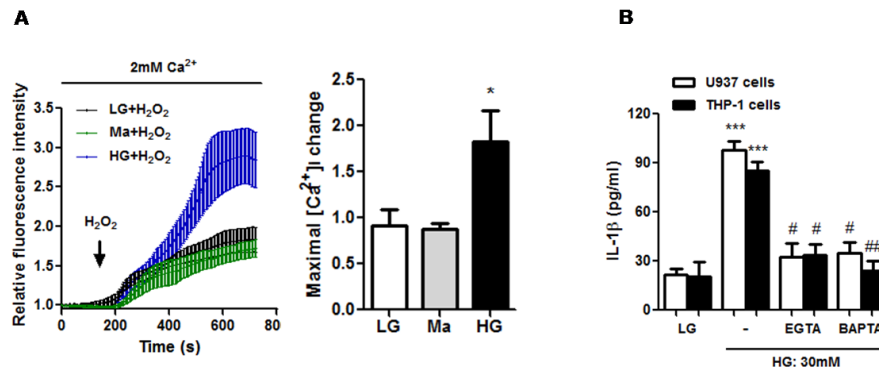

**Supplementary Figure S2.** (A) Relative changes in intracellular Ca<sup>2+</sup> concentration ([Ca<sup>2+</sup>]<sub>i</sub>), evoked by H<sub>2</sub>O<sub>2</sub> (1mM) over the time course. U937 cells were treated with low glucose (LG; 5.5mM glucose), mannitol (Ma; 30mM) or high glucose (HG; 30mM glucose) (n=5-6). (B) U937 cells and THP-1 cells were stimulated with LG or HG in the presence of EGTA (5mM) or BAPTA-AM (10 $\mu$ M) (n=5). IL-1 $\beta$  secretion was measured by ELISA. Data were shown as mean  $\pm$  S.E.M. (A,B)  $*P<0.05$  and  $***P<0.001$  vs. LG;  $#P<0.05$  and  $##P<0.01$  vs. HG.

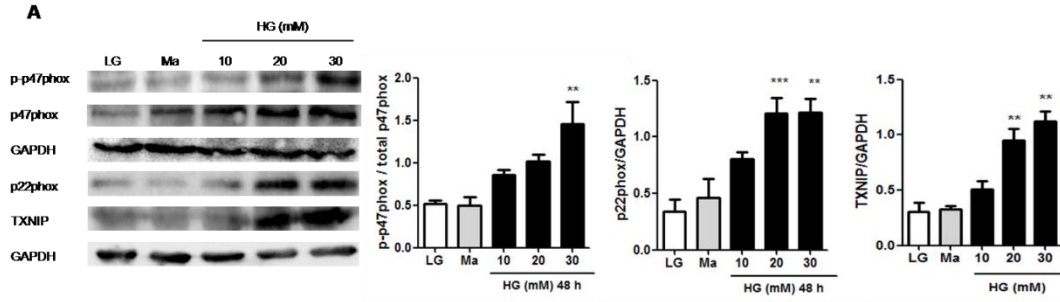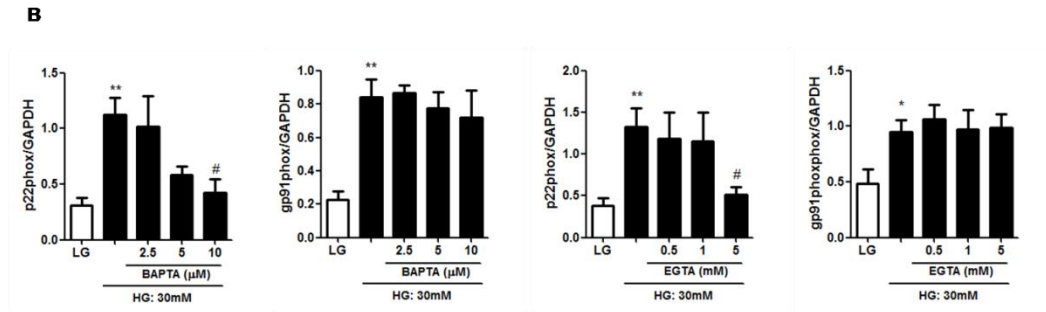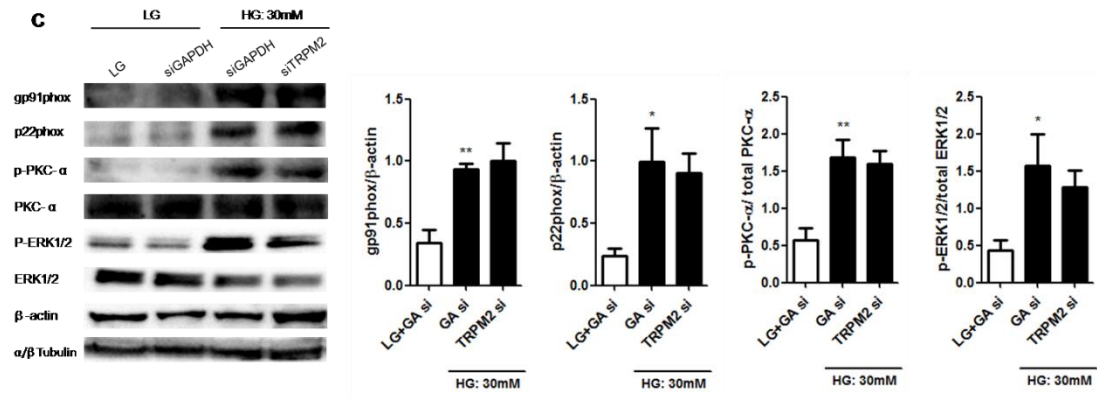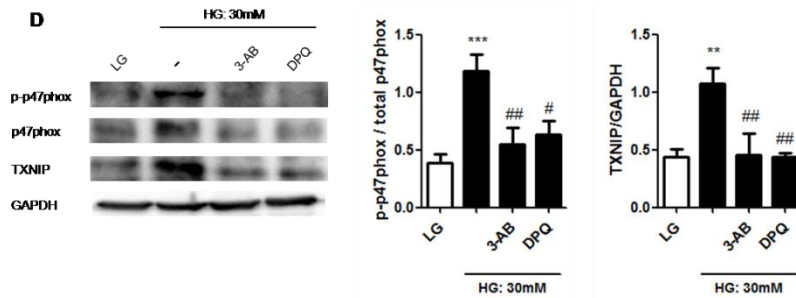

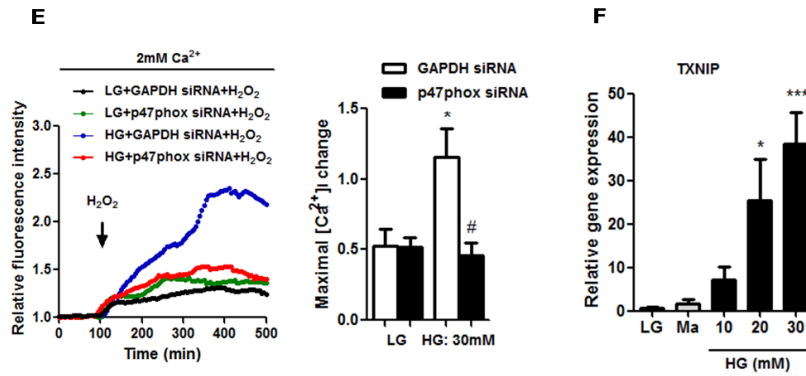

**Supplementary Figure S3.** (A) Representative immunoblots and graphs for protein expressions of p47phox, p22phox, TXNIP or GAPDH under low glucose (LG; 5.5mM glucose), mannitol (Ma; 30mM) or high glucose (HG; 10, 20, 30mM glucose) stimulation in U937 cells (n=4). (B) Graph for protein expressions of p22phox, gp91pox or GAPDH in the presence of BAPTA-AM (2.5, 5, 10μM), or EGTA (0.5, 1, 5mM) under LG or HG (n=4-5). (C) Representative immunoblots and graphs for protein expressions of gp91pox, p22phox, PKC-α, ERK1/2, β-actin or α/β-Tubulin in the presence of GAPDH- or TRPM2-siRNA under HG in U937 cells (n=4). (D) Representative immunoblots and graphs for protein expressions of p47phox, TXNIP or GAPDH in the presence of pre-treatment with 3-aminobenzamide (3-AB; 5mM) or 3,4-dihydro-5-[4-(1-piperidinyl)butoxy]-1(2H)-isoquinolinone (DPQ; 100μM) under HG (n=4). (E) Relative changes in intracellular Ca<sup>2+</sup> concentration ([Ca<sup>2+</sup>]<sub>i</sub>) over the time course. U937 cells were treated in the presence of GAPDH- or p47phox-siRNA evoked by H<sub>2</sub>O<sub>2</sub> (1mM) under LG or HG (n=4). (F) Quantitative PCR was performed on TXNIP mRNA, and it was normalized to LG. U937 cells were treated with LG, Ma

or HG for 48h (n=4). Data were shown as mean  $\pm$  S.E.M. (A,B,D,F)  $*P<0.05$ ,  $**P<0.01$  and  $***P<0.001$  vs. LG;  $\#P<0.05$  and  $\#\#P<0.01$  vs. HG. (C,E)  $*P<0.05$  and  $**P<0.01$  vs. LG+GAPDH-siRNA;  $\#P<0.05$  vs. HG+GAPDH-siRNA.

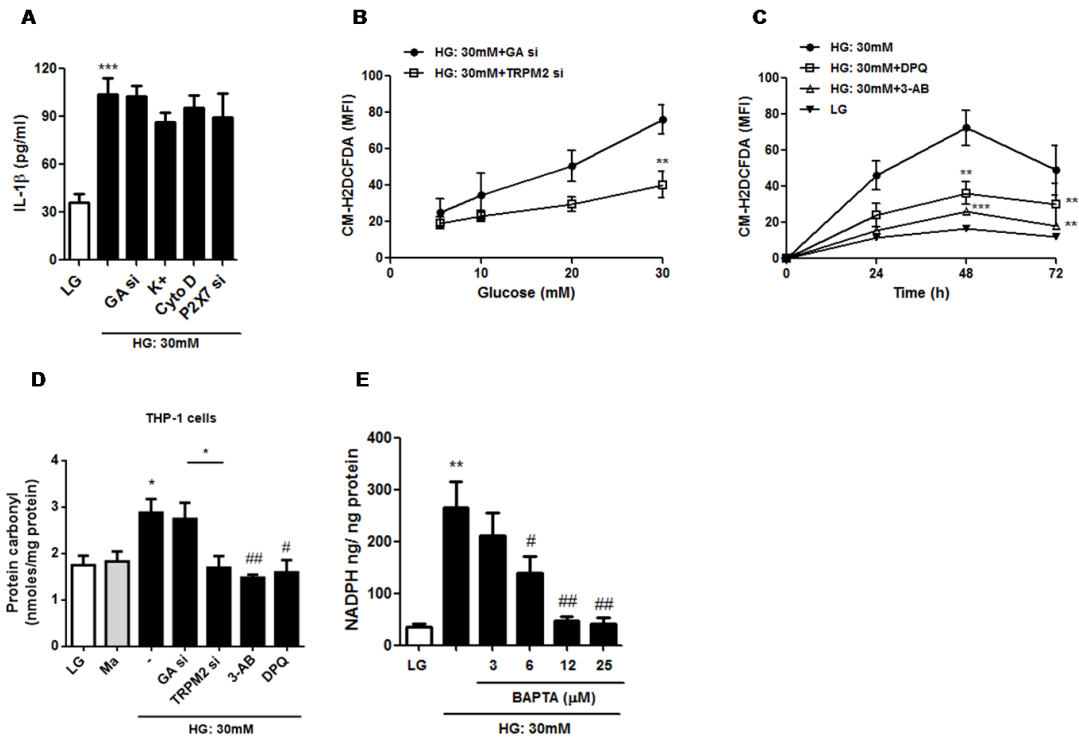

**Supplementary Figure S4.** (A) ELISA for IL-1 $\beta$  secretion from the supernatants of treated cells. (B,C) The ROS production was measured by CM-F2DCFDA. (D) The level of protein carbonyl content was measured by protein carbonyl content assay. (E) The cellular NADPH level was measured by NADP/NADPH assay, and NADPH oxidase activity was normalized to total cellular protein levels. (A,E) U937 cells were stimulated with low glucose (LG; 5.5mM glucose) or high glucose (HG; 30mM glucose) in the presence of (A) high K<sup>+</sup>(60mM), cytochalasin D (cyto D; 2 $\mu$ M), GADPH- (GA si) or P2X7-siRNA (n=5), or (E) BAPTA-AM (3, 6, 12, 25 $\mu$ M) (n=4).

(B) U937 cells were stimulated with HG (10, 20, 30mM glucose) in the presence of GAPDH- or TRPM2-siRNA (n=4). (C) U937 cells were stimulated with HG for 24, 48 or 72h with pre-treatment of 3-aminobenzamide (3-AB; 5mM) or 3,4-dihydro-5-[4-(1-piperidiny)butoxy]-1(2H)-isoquinolinone (DPQ; 100µM) (n=7). (D) THP-1 cells were pre-treated with 3-AB (5mM), DPQ (100µM), GAPDH- or TRPM2-siRNA under LG, mannitol (Ma; 30mM) or HG conditions (n=5). Data were shown as mean ± S.E.M. (A,D,E)  $**P<0.01$  and  $***P<0.001$  vs. LG;  $^{\#}P<0.05$  and  $^{\#\#}P<0.01$  vs. HG. (B)  $**P<0.01$  vs. HG+GAPDH-siRNA. (C)  $**P<0.01$  and  $***P<0.001$  vs. HG.
